# Supplementary material
Source: Springer Nature journal article supplement (https://www.springermedizin.de/resource/supplementary/12936_2012_2620_MOESM3_ESM.pdf/9543124)
Supplement: MOESM3 [file 9543124]

## Additional File 2: Health system parameter values

**Table S2: Health system parameter values**

| Parameter                                                                                             | Value   | Source             |
|-------------------------------------------------------------------------------------------------------|---------|--------------------|
| National guidelines for first line antimalarial                                                       | Coartem | DOMC 2006[1]       |
| National guidelines for inpatient antimalarial                                                        | Quinine | DOMC 2006[1]       |
| National guidelines for second line antimalarial                                                      | Quinine | DOMC 2006[1]       |
| Initial cure rate in the absence of resistance, first line (%)                                        | 0.96    | Juma 2008[2]       |
| Initial cure rate in the absence of resistance, inpatient (%)                                         | 0.998   | Ross 2008[3]       |
| Initial cure rate in the absence of resistance, second line (%)                                       | 0.998   | Ross 2008[3]       |
| Initial cure rate in the absence of resistance, self-treatment (%)                                    | 0.63    | Ross 2008[3]       |
| Population complying to drug regime, ACT (%)                                                          | 0.892   | Kabanywany 2010[4] |
| Population complying to drug regime, self-treatment (%)                                               | 0.85    | Ross 2008[3]       |
| Effectiveness of treatment of non-compliers, first line (%)                                           | 0.8544  | Fogg 2004[3]       |
| Effectiveness of treatment of non-compliers, self-treatment (%)                                       | 0       | Ross 2008[3]       |
| Probability that a patient with newly incident uncomplicated disease seeks official care per timestep | 0.04    | Ross 2008[3]       |
| Probability that a patient with uncomplicated disease self-treats per timestep                        | 0.0212  | Sumba 2008[5]      |
| Probability that a patient with recurrence of uncomplicated disease seeks official care per timestep  | 0.04    | Ross 2008[3]       |
| Probability that a patient with severe disease obtains appropriate care per timestep                  | 0.48    | Ross 2008[3]       |
| Probability of sequelae in inpatients per timestep, for individuals under 5 years old                 | 0.0132  | Ross 2008[3]       |
| Probability of sequelae in inpatients per timestep, for individuals over 5 years old                  | 0.005   | Ross 2008[3]       |

## References

1. DOMC: **National Guidelines for Diagnosis, Treatment and Prevention of Malaria in Kenya.** (Management DoMCC ed.; 2006.
2. Juma EA, Obonyo CO, Akhwale WS, Ogotu BR: **A randomized, open-label, comparative efficacy trial of artemether-lumefantrine suspension versus artemether-lumefantrine tablets for treatment of uncomplicated Plasmodium falciparum malaria in children in western Kenya.** *Malar J* 2008, **7**:262.

3. Ross A, Penny M, Maire N, Studer A, Carneiro I, Schellenberg D, Greenwood B, Tanner M, Smith T: **Modelling the epidemiological impact of intermittent preventive treatment against malaria in infants.** *PLoS One* 2008, **3**:e2661.
4. Kabanywany AM, Lengeler C, Kasim P, King'eng'ena S, Schlienger R, Mulure N, Genton B: **Adherence to and acceptability of artemether-lumefantrine as first-line anti-malarial treatment: evidence from a rural community in Tanzania.** *Malar J* 2010, **9**:48.
5. Sumba PO, Wong SL, Kanzaria HK, Johnson KA, John CC: **Malaria treatment-seeking behaviour and recovery from malaria in a highland area of Kenya.** *Malar J* 2008, **7**:245.
